## Forest yeast sampling biases

1 Quantifying the efficiency and biases of forest *Saccharomyces* sampling strategies

2

3 Primrose J. Boynton\*<sup>1</sup>, Vienna Kowallik<sup>2</sup>, Doreen Landermann<sup>1</sup>, Eva H.

4 Stukenbrock<sup>1,3</sup>

5

6 1) Max-Planck Institute for Evolutionary Biology, Environmental Genomics Research

7 Group, Plön, Germany

8 2) Okinawa Institute of Science and Technology, Okinawa, Japan

9 3) Christian-Albrechts Universität, Botanisches Institut, Kiel, Germany

10

11 \* To whom correspondence should be addressed:

12 pboynton@evolbio.mpg.de

13 August-Thienemann-Str. 2, 24306 Plön, Germany

14

15 Keywords: *Saccharomyces paradoxus*, *Saccharomyces cerevisiae*, forest, enrichment

16 culture, soil, environmental isolates

17 **Abstract**

18 *Saccharomyces* yeasts are emerging as model organisms for ecology and  
19 evolution, and researchers need environmental *Saccharomyces* isolates to test  
20 ecological and evolutionary hypotheses. However, methods for isolating  
21 *Saccharomyces* from nature have not been standardized and isolation methods can  
22 influence the genotypes and phenotypes of studied strains. We developed a direct  
23 isolation method for forest floor *Saccharomyces* and compared its success and  
24 phenotypic biases to a previously published enrichment-based isolation method. In a  
25 European forest, direct isolation was more successful at isolating *S. paradoxus*, but  
26 also more labor intensive, than enrichment culturing. Average growth rates of *S.*  
27 *paradoxus* isolates collected using the two methods did not differ at the enrichment  
28 isolation temperature, but variances in growth rates did: direct isolation produced a  
29 collection of *S. paradoxus* isolates with less variation in growth rates than enrichment  
30 culturing. In other words, enrichment culturing sampled more phenotypic diversity  
31 than direct isolation. Enrichment culturing also sampled more *Saccharomyces* species  
32 diversity than direct isolation, including our only isolations of rare *S. cerevisiae*.  
33 Enrichment culturing may sample higher *Saccharomyces* phenotypic and species  
34 diversity because of variations in interactions between yeasts and the other microbes  
35 that were present in the soil and leaf litter samples. We recommend direct culturing  
36 for researchers interested in randomly sampling their study habitats and enrichment  
37 culturing for researchers interested in discovering new *Saccharomyces* phenotypes or  
38 rare *Saccharomyces* species from natural environments. We include step-by-step  
39 sampling protocols in the supplemental materials.

40

41 **Introduction**

42 Naturally-occurring *Saccharomyces* populations are models for ecology and  
43 evolution (Boynton & Greig, 2014). Use of these models has led to exciting  
44 discoveries about the ecology and evolution of microbial phenotypes; for example,  
45 adaptation to climate can lead to speciation (Leducq et al., 2014), domesticated *S.*  
46 *cerevisiae* is more phenotypically diverse than wild *S. paradoxus* (Warringer et al.,  
47 2011), and interspecific hybrids can have high fitnesses in stressful environments  
48 (Bernardes, Stelkens, & Greig, 2017; Stelkens, Brockhurst, Hurst, Miller, & Greig,  
49 2014). These studies made inferences based on the phenotypes and genotypes of  
50 isolates collected from wild and domesticated substrates. And *Saccharomyces*  
51 substrates are diverse: wild substrates include tree bark, insect guts, leaf litter, soil,  
52 fruits, and parasitic *Cyttaria* galls, (Kowallik & Greig, 2016; Libkind et al., 2011;  
53 Mortimer & Polsinelli, 1999; Sampaio & Goncalves, 2008; Stefanini et al., 2012), and  
54 domesticated substrates include wine, beer, bread, kimchi, kombucha, palm wine, and  
55 pulque, among many other substrates (Boynton & Greig, 2016; Carbonetto,  
56 Ramsayer, Nidelet, Legrand, & Sicard, 2018; Estrada-Godina et al., 2001; Ezeronye  
57 & Okerentugba, 2001; Gallone et al., 2016; Greenwalt, Steinkraus, & Ledford, 2000;  
58 Jeong, Jung, Lee, Jin, & Jeon, 2013). One challenge of environmental yeast sampling  
59 is to minimize sampling biases so researchers can assure that differences among  
60 source environments, not sampling techniques, are responsible for observed  
61 phenotypic patterns.

62 Enrichment culturing is a reliable and frequently-used method for isolating  
63 difficult-to-culture microbes, including *Saccharomyces*, from natural environments  
64 (Schlegel & Jannasch, 1967; Sniegowski, Dombrowski, & Fingerman, 2002) (Figure  
65 1A). Microbiologists have been relying on enrichment cultures for over a century

## Forest yeast sampling biases

### A) Enrichment cultures

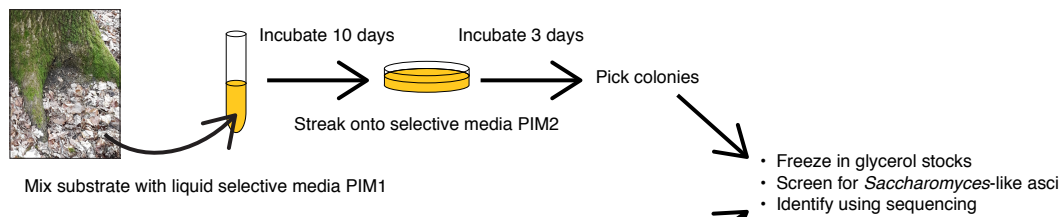

### B) Direct plating

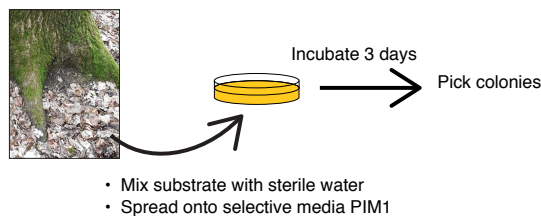

**Figure 1: Schematic illustration of sampling strategies used to isolate *Saccharomyces* for this project. A) Enrichment culturing B) Direct plating. Photo: Doreen Landermann**

66 (Beijernick, 1961), and have used enrichment culturing to isolate many of the model  
67 *Saccharomyces* strains commonly used in laboratory studies (Johnson et al., 2004;  
68 Liti et al., 2009; Sniegowski et al., 2002). To isolate a microbe using enrichment  
69 culturing, a researcher adds a small amount of natural material to a growth medium  
70 designed to be hospitable to the target microbe and inhospitable to other microbes  
71 (Liti, Warringer, & Blomberg, 2017; Schlegel & Jannasch, 1967). If the enrichment  
72 medium is well-designed, the target microbe is expected to grow in abundance, and  
73 after some incubation time, this enrichment culture can be streaked to solid media and  
74 colonies of the target microbe can be easily isolated. An alternative to enrichment  
75 culturing is to spread a microbial substrate directly onto a selective solid medium,  
76 with or without dilution, and to pick colonies which morphologically resemble the  
77 target microbe (Stefanini et al., 2012) (Figure 1B).

78 Because it can be difficult to isolate *Saccharomyces* from natural substrates,  
79 many investigations of wild *Saccharomyces* rely on enrichment culturing, usually in  
80 high-sugar, acidic media (Charron, Leducq, Bertin, Dube, & Landry, 2014; Robinson,  
81 Pinharanda, & Bensasson, 2016; Sniegowski et al., 2002; Sweeney, Kuehne, &

## Forest yeast sampling biases

82 Sniegowski, 2004). Comparative studies of *Saccharomyces* genomes have been  
83 carried out using *Saccharomyces* strains isolated using disparate strategies, including  
84 both enrichment and direct culturing (Liti et al., 2009; Peter et al., 2018). However,  
85 isolation strategy can influence the genotypes and phenotypes of isolated microbes  
86 (Stefani et al., 2015), and we were concerned about the biases that might be  
87 introduced during enrichment culturing of *Saccharomyces* yeasts. Specifically, we  
88 were concerned that isolation method might bias results in studies of *Saccharomyces*  
89 phenotypes. For example, enrichment culturing might select for individuals with high  
90 relative fitness in the enrichment medium. Such potential biases in sampled yeast  
91 phenotypes are likely to lead to biases in sampled genotypes because genetic  
92 information is responsible for expressed phenotypes. Isolation biases have also been  
93 suggested as potential explanations for differences between results of culture-  
94 dependent and culture-independent studies of environmental *Saccharomyces*  
95 (Alsammar et al., 2018).

96 This study's goals were to compare isolation success between enrichment  
97 culturing and a direct culturing strategy, and to quantify biases in *Saccharomyces*  
98 phenotypes (and therefore genotypes) that might be introduced when sampling a  
99 forest environment. We tested the assumption that it is easier to sample  
100 *Saccharomyces* from forest substrates using enrichment cultures than direct plating.  
101 We also compared growth rates between *S. paradoxus* isolated using enrichment and  
102 direct strategies. Enrichment culturing might decrease or increase sampled *S.*  
103 *paradoxus* phenotypic diversity compared to direct plating, thereby decreasing or  
104 increasing variance among *S. paradoxus* growth rates. For example, variance among  
105 growth rates would be low (and average growth rates high) among *S. paradoxus*  
106 isolated using enrichment cultures if the enrichment temperature and media select for

## Forest yeast sampling biases

107 the fastest growing *S. paradoxus* present in every sample. Conversely, variance  
108 among growth rates would be high for *S. paradoxus* isolated using enrichment  
109 cultures if diversity in the non-*Saccharomyces* microbial communities present on  
110 sampled substrates select for diverse *S. paradoxus* among samples.

111 To test these predictions, we compared *Saccharomyces* sampling success and  
112 isolates' growth rates among soil and leaf litter samples from a well-studied northern  
113 German forest (Kowallik & Greig, 2016; Kowallik, Miller, & Greig, 2015). A  
114 previous study showed that *S. paradoxus*, the wild sister species of the lab model *S.*  
115 *cerevisiae*, is readily isolated using enrichment cultures from oak leaf litter in this  
116 forest (Kowallik & Greig, 2016). We were also previously able to isolate *S.*  
117 *paradoxus* directly from these forest substrates without enrichment (Kowallik, 2015).

118

### 119 **Methods**

#### 120 Field sampling and yeast isolation

121 All isolates were sampled from a mixed hardwood and conifer forest in  
122 Nehnten, Schleswig-Holstein, northern Germany (Nehmtener Forst). We sampled  
123 leaf litter and soil material from close to the bases of ten oak trees at four sampling  
124 dates (Table 1), although not all trees were sampled at every date. Trees were between  
125 12 and 744 m from one another. At each date, samples were collected from leaf litter  
126 and the top organic layer of soil within one meter of the base of each tree. Paired leaf  
127 litter and soil samples were collected on the north, south, east, and west side of each  
128 tree at all collection days except 7 April, when samples were collected at an arbitrary  
129 two of the four cardinal directions.

130 Material was collected simultaneously for the **direct plating** and **enrichment**  
131 collections at each sampling point (Figure 1). First, leaf litter was collected by

## Forest yeast sampling biases

132 Table 1: Number of sampling points from each tree at each timepoint (each sampling  
133 point includes one enrichment and one direct plating sample)

|         | 21 March 2017 |        | 7 April 2017 |        | 12 June 2017 |        | 10 July 2017 |        |
|---------|---------------|--------|--------------|--------|--------------|--------|--------------|--------|
|         | soil          | litter | soil         | litter | soil         | litter | soil         | litter |
| Tree 1  | 4             | 4      | 2            | 2      | 4            | 4      | 4            | 4      |
| Tree 2  | 4             | 4      | 2            | 2      | 4            | 4      | 4            | 4      |
| Tree 3  | 4             | 4      | 2            | 2      | 4            | 4      | 4            | 4      |
| Tree 4  | 4             | 4      | 2            | 2      | 4            | 4      | 4            | 4      |
| Tree 5  | 4             | 4      |              |        |              |        | 4            | 4      |
| Tree 6  |               |        | 2            | 2      | 4            | 4      | 4            | 4      |
| Tree 7  |               |        | 2            | 2      | 4            | 4      | 4            | 4      |
| Tree 8  |               |        | 2            | 2      | 4            | 4      | 4            | 4      |
| Tree 9  |               |        |              |        | 4            | 4      | 4            | 4      |
| Tree 10 |               |        |              |        |              |        | 4            | 4      |

134

135 aseptically transferring litter into sterile collection tubes: approximately 5 ml of  
136 compressed leaf litter was collected for the direct plating method and approximately  
137 2 ml for the enrichment method. Then, the remaining leaf litter was removed from the  
138 soil surface and the top approximate 2 cm of soil (mostly composed of soil organic  
139 layer) were aseptically transferred into sterile collection tubes. As for leaf litter,  
140 approximately 5 ml of compressed soil was collected for the direct plating method  
141 and approximately 2 ml for the enrichment method. Instruments were sterilized  
142 between samples using 70% ethanol. Samples were transported between the field and  
143 lab at ambient temperature and processed within four hours of collection.

144 For **direct plating** (Figure 1A), material was mixed with 20 ml sterile water in  
145 a sterile 50 ml tube, the mixture was vigorously mixed for at least 10 seconds with a  
146 vortex mixer on its highest setting, and 0.2 ml of the resulting dirty liquid was  
147 pipetted on each of two plates containing solid modified selective media PIM1 (3 g  
148 yeast extract, 5 g peptone, 10 g sucrose, 3 g malt extract, 1 mg chloramphenicol, 80  
149 ml ethanol, 5.2 ml 1 M HCl, and 20 g agar per liter) (Kowallik & Greig, 2016;  
150 Sniegowski et al., 2002). Liquid was spread on plates using sterile glass beads, and

## Forest yeast sampling biases

151 plates were left open in a laminar flow hood until dry. Plates were incubated for three  
152 days at 30 °C before colonies were picked.

153 For **enrichments** (Figure 1B), material was mixed with 10 ml liquid selective  
154 media PIM1 (composition as for solid PIM1 but without agar) in a 15-ml sterile tube,  
155 mixtures were inverted, and tubes were incubated, slightly open and without shaking,  
156 at 30 °C. After 10 days, a sterile wooden stick was inserted into each enrichment tube  
157 and a small amount of liquid was streaked onto a single plate with solid selective  
158 media PIM2 (20 g Methyl-(alpha)-D-glucopyranoside, 1 ml 5% Antifoam Y-30  
159 emulsion, 6.7 g Yeast Nitrogen Base without amino acids, 4 ml 1M HCl, and 20 g  
160 agar per liter) (Kowallik & Greig, 2016; Sniegowski et al., 2002), and plates were  
161 incubated 4 days at 30°C before colonies were picked.

162 We include these procedures as step-by-step protocols for the convenience of  
163 future researchers in the supplementary materials (Supplemental File 1).

164

### 165 Yeast identification

166 After incubation, we streaked colonies with yeast-like morphology to fresh  
167 YPD media (10 g yeast extract, 20 g peptone, 20 g dextrose, and 25 g agar per liter).  
168 For each method, up to 6 (March and April sampling days) or 12 (June and July  
169 sampling days) colonies per sample were selected. After one day of growth on YPD at  
170 30 °C, cultures were frozen at -80 °C in 20% glycerol and a small amount of each  
171 culture was transferred to sporulation media (20 g potassium acetate, 2.2g yeast  
172 extract, 0.5 g dextrose, 870 mg complete amino acid mixture, and 25 g agar per liter).  
173 Any cultures with bacteria-like morphology on YPD media (slimy culture and/or cells  
174 smaller than 1 micron across) were not frozen and were discarded. Sporulation



## Forest yeast sampling biases

175 cultures were incubated for at least three days at room temperature before being  
176 screened under a compound microscope for *Saccharomyces*-like asci (tetrads).

177 All cultures producing tetrads were identified using sequencing of the internal  
178 transcribed sequence (ITS), a region neighboring rRNA-coding DNA (Schoch et al.,  
179 2012). We sequenced every strain using the ITS1/ITS4 primer pair (White, Bruns,  
180 Lee, & Taylor, 1990). PCR mixes were 7-15  $\mu$ l in volume and contained one yeast  
181 colony, 0.5  $\mu$ M each primer, and either 50% Phusion® High-Fidelity PCR master mix  
182 with HF buffer or 1x HF-buffer, 100  $\mu$ M dNTP mix, 3% DMSO, and 1 U/50  $\mu$ l  
183 Phusion DNA polymerase. PCR reactions were cycled at 98 °C for 30 s, then 35  
184 cycles of 98 °C for 5 s, 62 °C for 20 s, and 72 °C for 30 s, plus a 10 min terminal  
185 extension at 72 °C. PCR products were cleaned using illustra™ ExoProStar™  
186 according to the manufacturer's instructions, and sequenced on an ABI 3130xl  
187 sequencer.

188 ITS sequences were compared to sequences from the type or neotype strains of  
189 *S. paradoxus*, *S. cerevisiae*, *S. kudriavzevii*, and *S. mikatae* (Genbank accession  
190 numbers NR\_138272.1, NR\_111007.1, KY105195.1, and KY105198.1). If a  
191 sequence did not align with *Saccharomyces* sequences, we compared the sequence  
192 with all sequences in the NCBI database from type strains using BLAST (Zhang,  
193 Schwartz, Wagner, & Miller, 2000). If the sequence aligned with *Saccharomyces*  
194 sequences but had more than one base pair different from its closest match, we  
195 supplemented ITS sequences with sequences from the gene for translation elongation  
196 factor 1 using primers EF1-983F and EF1-2212R (Rehner & Buckley, 2005) using the  
197 protocols above, but with a PCR annealing temperature of 57 °C. In some cases,  
198 cultures originating from apparent single colonies were in fact mixtures of two yeast

199 species. We counted these colonies as *Saccharomyces* if sequences from one of the  
200 species was *Saccharomyces*.

201

## 202 Growth rates

203 We compared the distributions of maximum growth rates between two groups  
204 of *S. paradoxus* strains: strains collected using enrichment culturing and strains  
205 collected using direct plating. To avoid confounding effects of environmental source  
206 (*i.e.*, combination of substrate, date collected, and tree), we compared growth rates for  
207 pairs of *S. paradoxus* strains originating from the same environmental source. In other  
208 words, we collected a dataset of *S. paradoxus* growth rates from two groups of strains  
209 with equal representations of combinations of substrate, date collected, and tree, and  
210 differing only in the method used to isolate the strains. To ensure that all isolates were  
211 pure *S. paradoxus* cultures, we streaked all isolates used for growth rate  
212 measurements to single-colony cultures a second time and reidentified these cultures  
213 by mating them with a *S. paradoxus* tester strain (NCYC 3708,  $\alpha$ , *ura3::KANMX*,  
214 *ho::HYGMX*). In total, 110 isolates (55 from each sampling method) were measured.

215 Growth rates were measured using an Epoch 2 microplate reader (Biotek  
216 Instrument, Inc., Winooski, VT, USA) and calculated using the included Gen5  
217 software version 3.03.14 (Biotek Instrument, Inc., Winooski, VT, USA). We first  
218 inoculated strains in 0.2 ml liquid YPD media (composition as for solid YPD, but  
219 without agar) in a 96-well microplate and incubated cultures without shaking or  
220 measurement in the microplate reader at 30 °C for 24 hours to condition strains to  
221 microplate reader conditions. We then transferred 2  $\mu$ l from each culture to 198  $\mu$ l  
222 fresh liquid YEPD in a new microplate and incubated the new microplate under the  
223 same conditions for 20-24 hours. OD<sub>660</sub> was measured during the second incubation

224 every ten minutes, and maximum growth rate ( $\text{mOD}_{660}/\text{min}$ ) was calculated from the  
225 maximum slope of each growth curve over four points (30 min total) using Gen5  
226 software. Reported growth rates for each isolate are means of three replicates.

227

## 228 Statistical analyses

229 We compared sampling success across substrates (leaf litter or soil) and  
230 methods (direct plating or enrichment) using a generalized linear mixed-effects model  
231 with probability of isolating *Saccharomyces* (including *S. paradoxus* and *S.*  
232 *cerevisiae*) as the response variable, substrate and method as fixed effects, and tree  
233 and date as random effects. We selected the best model using a top-down strategy,  
234 comparing Akaike's Information Criteria (AIC) after removing predictors from a full  
235 model one by one.

236 We compared growth rate distributions by first comparing variances using  
237 Levene's test (Levene, 1960) for homogeneity of variance, and then comparing  
238 medians using a paired Wilcoxon signed rank test. Statistics were computed using R  
239 version 3.3.1 (R Development Core Team, 2016) and the car and lme4 packages  
240 (Bates, Machler, Bolker, & Walker, 2015; R Development Core Team, 2016).  
241 Graphics were produced using the ggplot2 package (Wickham, 2016).

242

## 243 **Results**

### 244 Influence of sampling method on success isolating *Saccharomyces*

245 Direct plating was more successful than enrichment culturing for isolating  
246 *Saccharomyces* from natural substrates ( $z = 6.1$ ,  $p < .001$ ) (Tables 2, 3, Figure 2). We  
247 found *Saccharomyces* isolates in 45% of direct plating cultures and 19% of  
248 enrichment cultures. However, enrichment culturing produced the only *S. cerevisiae*

## Forest yeast sampling biases

249 found in this study: we found six *S. cerevisiae* isolates from a single enrichment  
 250 culture from tree 3 in March of 2017. All other *Saccharomyces* isolates found in this  
 251 study were *S. paradoxus*. Other detected yeast species included *Saccharomycodes*  
 252 *ludwigii*, *Torulaspora delbrueckii*, *Pichia membranifaciens*, and *Hanseniaspora*  
 253 *osmophila*, all of which have previously been found alongside *Saccharomyces* yeasts  
 254 in beverage fermentations (Domizio et al., 2011; Gschaedler, 2017).

255 Table 2: Model selection (Mixed-effects generalized linear model)

| model    | fixed effects                         | random effects          | AIC           | compared to    | better model |
|----------|---------------------------------------|-------------------------|---------------|----------------|--------------|
| 1        | method + substrate + method:substrate | 1 tree + 1 month        | 447.20        |                |              |
| 2        | method + substrate + method:substrate | 1 month                 | 470.94        | model 1        | 1            |
| 3        | method + substrate + method:substrate | 1 tree                  | 451.99        | model 1        | 1            |
| <b>4</b> | <b>method + substrate</b>             | <b>1 tree + 1 month</b> | <b>446.76</b> | <b>model 1</b> | <b>4</b>     |
| 5        | method                                | 1 tree + 1 month        | 480.34        | model 4        | 4            |
| 6        | substrate                             | 1 tree + 1 month        | 485.71        | model 4        | 4            |

256

257 Table 3: Model summary table (model 4)

|                  | Estimate | Std. Error | z      | p      |
|------------------|----------|------------|--------|--------|
| intercept        | -2.5324  | 0.4599     | -5.506 | < .001 |
| method (plating) | 1.5494   | 0.2559     | 6.054  | < .001 |
| substrate (soil) | 1.4445   | 0.2542     | 5.683  | < .001 |

258

### A) Enrichment cultures

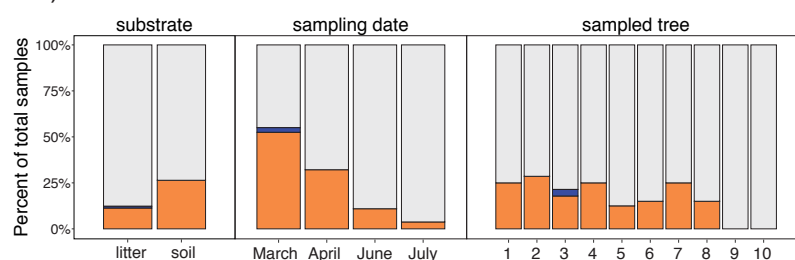

### B) Direct plating

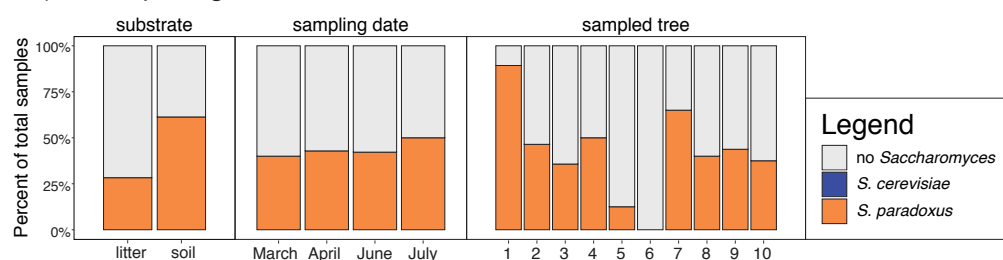

**Figure 2: Percentages of samples in which *Saccharomyces* could be detected using A) enrichment cultures or B) direct plating. Bars represent all samples for each category of sampling, and colors represent *Saccharomyces* species. *S. paradoxus* and *S. cerevisiae* were the only detected *Saccharomyces* species.**

259 While the direct plating method was more successful than the enrichment  
260 method, it was also more labor-intensive (Table 4). We screened 3.4 times as many  
261 colonies for tetrads when using the direct plating method than we did using the  
262 enrichment method. Only 32% of the processed direct plating colonies were *S.*  
263 *paradoxus*, compared to 74% of enrichment colonies.

264

265 Table 4: Colonies processed and sampling success for each method

| method     | total colonies<br>picked | sequenced colonies with                        |                                  |
|------------|--------------------------|------------------------------------------------|----------------------------------|
|            |                          | <i>Saccharomyces</i> -like ascus<br>morphology | <i>Saccharomyces</i><br>isolates |
| enrichment | 284                      | 246 (87%)                                      | 211 (74%)                        |
| plating    | 969                      | 344 (35%)                                      | 307 (32%)                        |

266

267 Both methods isolated *Saccharomyces* colonies from both substrates, most  
268 trees, and all timepoints (Figure 2). We had significantly more sampling success on  
269 soil than leaf litter substrates ( $z = 5.7$ ,  $p < .001$ , Table 3), but other relationships  
270 among sampling success, sampling method, and sampling environments were  
271 idiosyncratic. For example, direct plating did not produce any *Saccharomyces*  
272 isolates from tree 6, while three enrichment samples from this tree isolated *S.*  
273 *paradoxus*, and enrichments produced more *Saccharomyces* isolates in March than  
274 direct plating did (Figure 2). Because our sampling effort was not the same for all  
275 trees at all months, we did not model tree habitat or sampling month as fixed effects;  
276 instead, we modeled these parameters as random effects, and found that models  
277 including tree and month fit the data better than models without tree and month (Table  
278 2). A list of sequenced yeasts from each sample is included in the supplemental  
279 materials (Supplemental File 2).

280

281 Phenotypes of sampled *S. paradoxus*

## Forest yeast sampling biases

282 Variances in growth rate, but not median growth rates, were different between  
283 strains isolated using the two methods (Figure 3). Growth rates of *S. paradoxus*  
284 isolated using enrichment culturing had a larger variance than growth rates of *S.*  
285 *paradoxus* isolated using direct plating (Levine's test  $F_{1,108} = 5.42$ ,  $p = .02$ ). Median  
286 growth rates for the two groups of *S. paradoxus* strains did not differ (Wilcoxon  
287 signed rank test  $V = 6320$ ,  $p = .39$ ). Measured growth rates of each strain are included  
288 in the supplemental materials (Supplemental File 2).

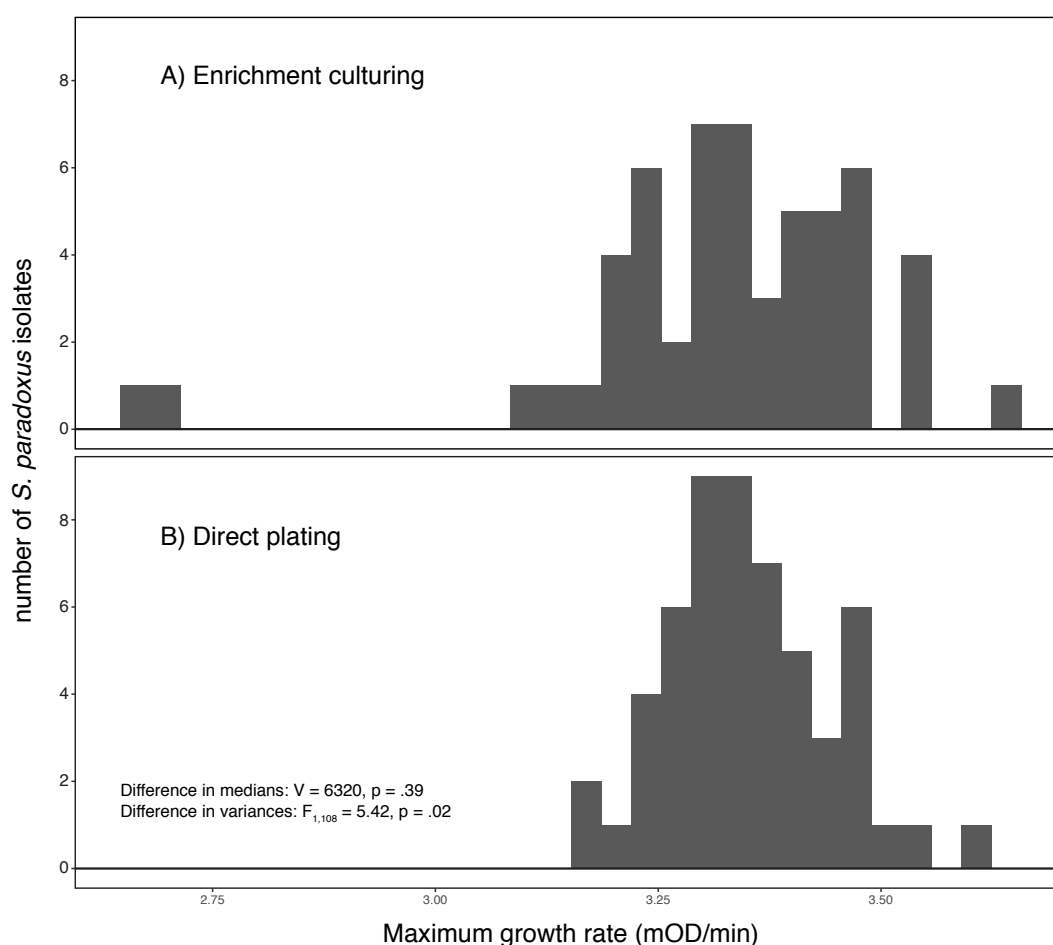

**Figure 3: Histograms representing distributions of growth rates for *S. paradoxus* clones isolated using A) enrichment culturing or B) direct plating.**

289

## 290 Discussion

291 Direct plating detects *S. paradoxus* more frequently than enrichment culturing

## Forest yeast sampling biases

292           Enrichment culturing did not increase *Saccharomyces* sampling success from  
293 forest leaf litter and soil over direct plating, in spite of researchers' long history of  
294 using enrichment culturing to isolate *Saccharomyces* from forest environments  
295 (Kowallik & Greig, 2016; Naumov, Naumova, & Sniegowski, 1998; Sniegowski et  
296 al., 2002). We expect reliable *Saccharomyces* isolation from this forest using direct  
297 plating to be a result of high *S. paradoxus* abundance on forest floor substrates.  
298 Indeed, it is common to find hundreds to tens of thousands of *S. paradoxus* cells per  
299 gram of leaf litter near the bases of oak trees in this forest (Kowallik & Greig, 2016).  
300 We expect direct plating to be less successful in environments in which  
301 *Saccharomyces* are rarer, and note that enrichment culturing is frequently used to  
302 isolate *Saccharomyces* from tree bark, which may be a habitat with lower  
303 *Saccharomyces* density than the forest floor habitats we sampled (Kowallik et al.,  
304 2015; Sniegowski et al., 2002).

305

306 Isolation using enrichment culturing samples more phenotypic diversity than direct  
307 plating

308           Conditions in enrichment cultures resulted in isolating a different (albeit  
309 higher) phenotypic diversity than random colony selection on plate cultures did  
310 (Figure 3). There are several potential methodological and ecological explanations for  
311 the high phenotypic diversity in enrichment isolates. But we expect that interactions  
312 with microbes *during the enrichment culturing* are most likely to be responsible for  
313 the increased phenotypic diversity among enrichment-sourced *S. paradoxus* isolates.

314           Microbes that potentially interact with *S. paradoxus* were doubtless present in  
315 our enrichment cultures, and it is realistic to expect these microbes to influence the  
316 phenotypes of the *S. paradoxus* that were ultimately recovered. Our enrichment

## Forest yeast sampling biases

317 cultures contained all of the microbes that were present in the soil and leaf litter  
318 samples, and soil and leaf litter include a wide diversity of bacterial and fungal taxa  
319 that can interact with fungi (Curd, Martiny, Li, & Smith, 2018; Glassman et al., 2018;  
320 Santonja et al., 2018). For example, some agricultural soils contain *Bacillus* and  
321 *Pseudomonas* species that secrete compounds toxic to phytopathogenic fungi (Islam,  
322 Jeong, Lee, & Song, 2012; Petatán-Sagahón et al., 2011). Conversely, some soil  
323 bacteria promote mycorrhizal fungal growth and host plant colonization (Xie et al.,  
324 2018).

325         We expect a variety of similar inhibition and facilitation interactions to  
326 determine the identities of the *Saccharomyces* strains that ultimately reached high  
327 frequencies in enrichment cultures. Bacteria and fungi co-occurring with *S. paradoxus*  
328 on oak bark can both inhibit and facilitate *S. paradoxus* growth (Kowallik et al.,  
329 2015). These effects are dependent on temperature and interacting microbe identities,  
330 and likely also depend on other environmental conditions and *S. paradoxus* genotype.  
331 The *Saccharomyces* strains recovered at the end of our enrichment cultures were  
332 probably the fittest *Saccharomyces* strains present in the cultures, but this high  
333 relative fitness was as likely to be a result of interactions with co-occurring microbes  
334 that occur by chance in the same enrichment cultures as it was to be the result of  
335 intrinsic growth rate. Microbial diversity during enrichment may similarly explain our  
336 idiosyncratic sampling success across months and trees (Figure 2). For example, it is  
337 possible that a bacterium that facilitates rare *S. paradoxus* growth in the enrichment  
338 medium was more common in spring than summer months, resulting in higher  
339 enrichment sampling success in spring than summer. Unfortunately, we did not  
340 measure the microbial diversity of the enrichment cultures and do not know which  
341 microbes may have interacted with *Saccharomyces*.



## Forest yeast sampling biases

342 It is also possible, although in our opinion less likely, that methodological  
343 biases resulted in relatively low phenotypic diversity among directly plated *S.*  
344 *paradoxus* compared to enrichment *S. paradoxus*. While we aimed to randomly select  
345 colonies with *Saccharomyces*-like morphologies from direct culture plates, biases in  
346 colony picking could have selected for low variance in *S. paradoxus* phenotypes. For  
347 example, if a *S. paradoxus* colony had an unusual morphology, it might have been  
348 mistaken for a bacterial colony and not isolated. However, direct culturing isolated  
349 more non-*Saccharomyces* yeast isolates than enrichment culturing did, and we expect  
350 interspecific morphological variation to be higher than intraspecific morphological  
351 variation. We therefore consider it unlikely that biases in colony picking decreased  
352 phenotypic variance among *S. paradoxus* isolates.

353 We continue to expect plate culturing to be a more random sampling of  
354 *Saccharomyces* diversity than enrichment culturing. Colonies are physically isolated  
355 on a plate and unlikely to influence each other's growth, and plated colonies come  
356 from a well-mixed mixture of environmental substrate and sterile water. We therefore  
357 expect *Saccharomyces* colonies on plates to accurately reflect the diversity of  
358 *Saccharomyces* strains present in nature, as long as all strains are able to grow on the  
359 selective media chosen. Biases in sample *success* can still be introduced to direct  
360 plating samples by the presence of morphologically similar yeast species. On petri  
361 dishes, a high density of non-*Saccharomyces* yeasts with morphologies similar to  
362 *Saccharomyces* could have prevented us from detecting *Saccharomyces*. This issue  
363 can be mitigated by designing a more selective isolation medium, picking more  
364 colonies per plate (we picked up to 6 or 12 colonies across two plates), or replica  
365 plating selective plates to media containing a color indicator for the target yeast (*e.g.*,  
366 Wallerstein media) (Hall, 1971).

367

368 Recommendations for future yeast sampling

369         Researchers should consider both resources available for sampling and study  
370 goals when choosing a *Saccharomyces* field sampling strategy. Our results identified  
371 a tradeoff between resources spent on sampling and resources spent on sequencing:  
372 enrichment culturing was less successful than direct plating at finding *Saccharomyces*  
373 per sample collected, but more successful per ITS region sequenced (Figure 2, Table  
374 4). Researchers with a few precious samples are therefore better off isolating  
375 *Saccharomyces* using direct plating than enrichments, especially if *Saccharomyces* is  
376 common on their substrates. Conversely, if samples are easy to get but funds available  
377 for sequencing are limited, researchers may prefer to use enrichment culturing.  
378 Researchers with limited time or freezer space who would like assurances that most  
379 picked colonies are *Saccharomyces* may also prefer enrichment culturing.

380         However, the scientific question to be answered by environmental  
381 *Saccharomyces* samples may be more important than sampling and sequencing  
382 resource limitations, especially as sequencing becomes cheaper. Direct plating  
383 samples a more random collection of *Saccharomyces* cells from environmental  
384 samples than enrichment culturing, and we recommend that researchers who need  
385 random environmental samples to answer ecological and evolutionary questions rely  
386 on direct plating. Researchers targeting phenotypic diversity, especially for applied  
387 yeast biology (*e.g.*, food microbiology, drug discovery) may uncover more diversity  
388 by isolating environmental *Saccharomyces* using enrichment cultures. Researchers  
389 interested in detecting rare *Saccharomyces* species in an environment (*e.g.*, *S.*  
390 *cerevisiae* from our study forest, *S. mikatae* and *S. eubayanus* from European forests)

391 (Alsammar et al., 2018) may also have more success using enrichment culturing or a  
392 combination of enrichment and direct plating strategies.

393

### 394 **Conclusions**

395 Isolation protocols do indeed influence characteristics of isolated microbes. As  
396 researchers continue to develop *Saccharomyces* yeasts as model organisms for  
397 ecology and evolution, they must also consider how isolation history of environmental  
398 strains can influence the ecological stories the strains can tell. The results of this study  
399 highlight the need for consistent sampling within studies, and are a warning to  
400 researchers comparing phenotypes (and perhaps also genotypes) among  
401 *Saccharomyces* strains from different sources. Much of what we know about  
402 *Saccharomyces* evolution has come from culture collections (Strope et al., 2015;  
403 Warringer et al., 2011)—these collections are invaluable, as are the data and  
404 conclusions they enable, but sampling information about deposited strains is not  
405 always available. As technology improves and both genome sequencing and  
406 phenotype assays become cheaper and more accessible (Porter & Hajibabaei, 2018;  
407 Stewart et al., 2018; van Dijk, Auger, Jaszczyszyn, & Thermes, 2014; Zackrisson et  
408 al., 2016), environmental sampling may emerge as a limiting step to studying  
409 *Saccharomyces* ecology and evolution. Researchers should carefully consider the  
410 consequences of their chosen sampling strategies as they conduct this exciting  
411 microbiological research.

412

### 413 **Acknowledgements**

414 We would like to thank Danielle Stevens and Tjorben Nawroth for help in the field,  
415 Jenna Gallie and the Gallie lab for help with growth curves, and Amine Hassani for

416 helpful conversations on microbial diversity in enrichment cultures. Thank you to  
417 Christoph Freiherr von Fürstenberg-Plessen for permission to work in the Nehnten  
418 forest. This work was supported through a Max Planck Fellowship to Eva H.  
419 Stukenbrock.

420

#### 421 **Data Accessibility**

422 All data for this project are included in Supplementary File 2.

423

#### 424 **Figure Legends**

425 Figure 1: Schematic illustration of sampling strategies used to isolate *Saccharomyces*  
426 for this project. A) Enrichment culturing B) Direct plating. Photo: Doreen  
427 Landermann.

428

429 Figure 2: Percentages of samples in which *Saccharomyces* could be detected using A)  
430 enrichment cultures or B) direct plating. Bars represent all samples for each category  
431 of sampling, and colors represent *Saccharomyces* species. *S. paradoxus* and *S.*  
432 *cerevisiae* were the only detected *Saccharomyces* species.

433

434 Figure 3: Histograms representing distributions of growth rates for *S. paradoxus*  
435 clones isolated using A) enrichment culturing or B) direct plating.

436

#### 437 **Citations**

438 Alsammar, H. F., Naseeb, S., Brancia, L. B., Gilman, R. T., Wang, P., & Delneri, D.  
439 (2018). Targeted metagenomics approach to capture the biodiversity of  
440 *Saccharomyces* genus in wild environments. *Environmental Microbiology*  
441 *Reports*. doi:10.1111/1758-2229.12724  
442 Bates, D., Machler, M., Bolker, B. M., & Walker, S. C. (2015). Fitting Linear Mixed-  
443 Effects Models Using lme4. *Journal of Statistical Software*, 67(1), 1-48.

- 444 Beijernick, M. W. (1961). Enrichment culture studies with urea bacteria (T. D. Brock,  
445 Trans.). In T. D. Brock (Ed.), *Milestones in Microbiology*. London, United  
446 Kingdom: Prentice-Hall International.
- 447 Bernardes, J. P., Stelkens, R. B., & Greig, D. (2017). Heterosis in hybrids within and  
448 between yeast species. *Journal of Evolutionary Biology*, 30(3), 538-548.  
449 doi:10.1111/jeb.13023
- 450 Boynton, P. J., & Greig, D. (2014). The ecology and evolution of non-domesticated  
451 *Saccharomyces* species. *Yeast*, 31(12), 449-462. doi:10.1002/yea.3040
- 452 Boynton, P. J., & Greig, D. (2016). Species richness influences wine ecosystem  
453 function through a dominant species. *Fungal Ecology*, 22, 61-72.  
454 doi:10.1016/j.funeco.2016.04.008
- 455 Carbonetto, B., Ramsayer, J., Nidelet, T., Legrand, J., & Sicard, D. (2018). Bakery  
456 yeasts, a new model for studies in ecology and evolution. *Yeast*, 35(11), 591-  
457 603. doi:10.1002/yea.3350
- 458 Charron, G., Leducq, J. B., Bertin, C., Dube, A. K., & Landry, C. R. (2014).  
459 Exploring the northern limit of the distribution of *Saccharomyces cerevisiae*  
460 and *Saccharomyces paradoxus* in North America. *FEMS Yeast Research*,  
461 14(2), 281-288. doi:10.1111/1567-1364.12100
- 462 Curd, E. E., Martiny, J. B. H., Li, H. Y., & Smith, T. B. (2018). Bacterial diversity is  
463 positively correlated with soil heterogeneity. *Ecosphere*, 9(1), 16.  
464 doi:10.1002/ecs2.2079
- 465 Domizio, P., Romani, C., Comitini, F., Gobbi, M., Lencioni, L., Mannazzu, I., &  
466 Ciani, M. (2011). Potential spoilage non-Saccharomyces yeasts in mixed  
467 cultures with *Saccharomyces cerevisiae*. *Annals of Microbiology*, 61(1), 137-  
468 144. doi:10.1007/s13213-010-0125-1
- 469 Estrada-Godina, A. R., Cruz-Guerrero, A. E., Lappe, P., Ulloa, M., Garcia-Garibay,  
470 M., & Gomez-Ruiz, L. (2001). Isolation and identification of killer yeasts  
471 from Agave sap (aguamiel) and pulque. *World Journal of Microbiology &*  
472 *Biotechnology*, 17(6), 557-560. doi:10.1023/a:1012210106203
- 473 Ezeronye, O. U., & Okerentugba, P. O. (2001). Genetic and physiological variants of  
474 yeast selected from palm wine. *Mycopathologia*, 152(2), 85-89.  
475 doi:10.1023/a:1012323721012
- 476 Gallone, B., Steensels, J., Prahl, T., Soriaga, L., Saels, V., Herrera-Malaver, B., . . .  
477 Verstrepen, K. J. (2016). Domestication and Divergence of *Saccharomyces*  
478 *cerevisiae* Beer Yeasts. *Cell*, 166(6), 1397+. doi:10.1016/j.cell.2016.08.020
- 479 Glassman, S. I., Weihe, C., Li, J. H., Albright, M. B. N., Looby, C. I., Martiny, A. C.,  
480 . . . Martiny, J. B. H. (2018). Decomposition responses to climate depend on  
481 microbial community composition. *Proceedings of the National Academy of*  
482 *Sciences of the United States of America*, 115(47), 11994-11999.  
483 doi:10.1073/pnas.1811269115
- 484 Greenwalt, C. J., Steinkraus, K. H., & Ledford, R. A. (2000). Kombucha, the  
485 fermented tea: Microbiology, composition, and claimed health effects. *Journal*  
486 *of Food Protection*, 63(7), 976-981. doi:10.4315/0362-028x-63.7.976
- 487 Gschaedler, A. (2017). Contribution of non-conventional yeasts in alcoholic  
488 beverages. *Current Opinion in Food Science*, 13, 73-77.  
489 doi:10.1016/j.cofs.2017.02.004
- 490 Hall, J. F. (1971). Detection of wild yeasts in the brewery. *Journal of the Institute of*  
491 *Brewing*, 77(6), 513-516. doi:10.1002/j.2050-0416.1971.tb03413.x
- 492 Islam, M. R., Jeong, Y. T., Lee, Y. S., & Song, C. H. (2012). Isolation and  
493 Identification of Antifungal Compounds from *Bacillus subtilis* C9 Inhibiting

- 494 the Growth of Plant Pathogenic Fungi. *Mycobiology*, 40(1), 59-66.  
495 doi:10.5941/myco.2012.40.1.059
- 496 Jeong, S. H., Jung, J. Y., Lee, S. H., Jin, H. M., & Jeon, C. O. (2013). Microbial  
497 succession and metabolite changes during fermentation of dongchimi,  
498 traditional Korean watery kimchi. *International Journal of Food*  
499 *Microbiology*, 164(1), 46-53. doi:10.1016/j.ijfoodmicro.2013.03.016
- 500 Johnson, L. J., Koufopanou, V., Goddard, M. R., Hetherington, R., Schafer, S. M., &  
501 Burt, A. (2004). Population genetics of the wild yeast *Saccharomyces*  
502 *paradoxus*. *Genetics*, 166(1), 43-52. doi:10.1534/genetics.166.1.43
- 503 Kowallik, V. (2015). *The natural ecology of Saccharomyces yeasts*. (Dr. rer. nat.),  
504 Christian Albrechts University of Kiel,
- 505 Kowallik, V., & Greig, D. (2016). A systematic forest survey showing an association  
506 of *Saccharomyces paradoxus* with oak leaf litter. *Environmental Microbiology*  
507 *Reports*, 8(5), 833-841. doi:10.1111/1758-2229.12446
- 508 Kowallik, V., Miller, E., & Greig, D. (2015). The interaction of *Saccharomyces*  
509 *paradoxus* with its natural competitors on oak bark. *Molecular Ecology*, 24(7),  
510 1596-1610. doi:10.1111/mec.13120
- 511 Leducq, J. B., Charron, G., Samani, P., Dube, A. K., Sylvester, K., James, B., . . .  
512 Landry, C. R. (2014). Local climatic adaptation in a widespread  
513 microorganism. *Proceedings of the Royal Society B-Biological Sciences*,  
514 281(1777), 9. doi:10.1098/rspb.2013.2472
- 515 Levene, H. (1960). Robust tests for equality of variances. In I. Olkin & H. Hotelling  
516 (Eds.), *Contributions to Probability and Statistics: Essays in Honor of Harold*  
517 *Hotelling* (pp. 278-292): Stanford University Press.
- 518 Libkind, D., Hittinger, C. T., Valerio, E., Goncalves, C., Dover, J., Johnston, M., . . .  
519 Sampaio, J. P. (2011). Microbe domestication and the identification of the  
520 wild genetic stock of lager-brewing yeast. *Proceedings of the National*  
521 *Academy of Sciences of the United States of America*, 108(35), 14539-14544.  
522 doi:10.1073/pnas.1105430108
- 523 Liti, G., Carter, D. M., Moses, A. M., Warringer, J., Parts, L., James, S. A., . . . Louis,  
524 E. J. (2009). Population genomics of domestic and wild yeasts. *Nature*,  
525 458(7236), 337-341. doi:10.1038/nature07743
- 526 Liti, G., Warringer, J., & Blomberg, A. (2017). Isolation and Laboratory  
527 Domestication of Natural Yeast Strains. *Cold Spring Harb Protoc*, 2017(8),  
528 pdb.prot089052. doi:10.1101/pdb.prot089052
- 529 Mortimer, R., & Polsinelli, M. (1999). On the origins of wine yeast. *Research in*  
530 *Microbiology*, 150(3), 199-204. doi:10.1016/s0923-2508(99)80036-9
- 531 Naumov, G. I., Naumova, E. S., & Sniegowski, P. D. (1998). *Saccharomyces*  
532 *paradoxus* and *Saccharomyces cerevisiae* are associated with exudates of  
533 North American oaks. *Canadian Journal of Microbiology*, 44(11), 1045-1050.  
534 doi:10.1139/cjm-44-11-1045
- 535 Petatán-Sagahón, I., Anducho-Reyes, M. A., Silva-Rojas, H. V., Arana-Cuenca, A.,  
536 Tellez-Jurado, A., Cárdenas-Álvarez, I. O., & Mercado-Flores, Y. (2011).  
537 Isolation of Bacteria with Antifungal Activity against the Phytopathogenic  
538 Fungi *Stenocarpella maydis* and *Stenocarpella macrospora*. *International*  
539 *Journal of Molecular Sciences*, 12(9), 5522-5537. doi:10.3390/ijms12095522
- 540 Peter, J., De Chiara, M., Friedrich, A., Yue, J. X., Pflieger, D., Bergstrom, A., . . .  
541 Schacherer, J. (2018). Genome evolution across 1,011 *Saccharomyces*  
542 *cerevisiae* isolates. *Nature*, 556(7701), 339-+. doi:10.1038/s41586-018-0030-  
543 5



- 544 Porter, T. M., & Hajibabaei, M. (2018). Scaling up: A guide to high-throughput  
545 genomic approaches for biodiversity analysis. *Molecular Ecology*, 27(2), 313-  
546 338. doi:10.1111/mec.14478
- 547 R Development Core Team. (2016). R: A language and Environment for Statistical  
548 Computing. Vienna, Austria: R Foundation for Statistical Computing.
- 549 Rehner, S. A., & Buckley, E. (2005). A *Beauveria* phylogeny inferred from nuclear  
550 ITS and EF1-alpha sequences: evidence for cryptic diversification and links to  
551 *Cordyceps teleomorphs*. *Mycologia*, 97(1), 84-98.  
552 doi:10.3852/mycologia.97.1.84
- 553 Robinson, H. A., Pinharanda, A., & Bensasson, D. (2016). Summer temperature can  
554 predict the distribution of wild yeast populations. *Ecology and Evolution*, 6(4),  
555 1236-1250. doi:10.1002/ece3.1919
- 556 Sampaio, J. P., & Goncalves, P. (2008). Natural populations of *Saccharomyces*  
557 *kudriavzevii* in Portugal are associated with oak bark and are sympatric with *S.*  
558 *cerevisiae* and *S. paradoxus*. *Applied and Environmental Microbiology*, 74(7),  
559 2144-2152. doi:10.1128/aem.02396-07
- 560 Santonja, M., Foucault, Q., Rancon, A., Gauquelin, T., Fernandez, C., Baldy, V., &  
561 Mirleau, P. (2018). Contrasting responses of bacterial and fungal communities  
562 to plant litter diversity in a Mediterranean oak forest. *Soil Biology &*  
563 *Biochemistry*, 125, 27-36. doi:10.1016/j.soilbio.2018.06.020
- 564 Schlegel, H. G., & Jannasch, H. W. (1967). Enrichment cultures. *Annual Reviews*  
565 *Microbiology*, 21, 49-70. doi:10.1146/annurev.mi.21.100167.000405
- 566 Schoch, C. L., Seifert, K. A., Huhndorf, S., Robert, V., Spouge, J. L., Levesque, C.  
567 A., . . . Fungal Barcoding, C. (2012). Nuclear ribosomal internal transcribed  
568 spacer (ITS) region as a universal DNA barcode marker for Fungi.  
569 *Proceedings of the National Academy of Sciences of the United States of*  
570 *America*, 109(16), 6241-6246. doi:10.1073/pnas.1117018109
- 571 Sniegowski, P. D., Dombrowski, P. G., & Fingerman, E. (2002). *Saccharomyces*  
572 *cerevisiae* and *Saccharomyces paradoxus* coexist in a natural woodland site in  
573 North America and display different levels of reproductive isolation from  
574 European conspecifics. *FEMS Yeast Research*, 1(4), 299-306.  
575 doi:10.1111/j.1567-1364.2002.tb00048.x
- 576 Stefani, F. O. P., Bell, T. H., Marchand, C., de la Providencia, I. E., El Yassimi, A.,  
577 St-Arnaud, M., & Hijri, M. (2015). Culture-Dependent and -Independent  
578 Methods Capture Different Microbial Community Fractions in Hydrocarbon-  
579 Contaminated Soils. *PLoS One*, 10(6), 16. doi:10.1371/journal.pone.0128272
- 580 Stefanini, I., Dapporto, L., Legras, J. L., Calabretta, A., Di Paola, M., De Filippo, C., .  
581 . . Cavalieri, D. (2012). Role of social wasps in *Saccharomyces cerevisiae*  
582 ecology and evolution. *Proceedings of the National Academy of Sciences of*  
583 *the United States of America*, 109(33), 13398-13403.  
584 doi:10.1073/pnas.1208362109
- 585 Stelkens, R. B., Brockhurst, M. A., Hurst, G. D. D., Miller, E. L., & Greig, D. (2014).  
586 The effect of hybrid transgression on environmental tolerance in experimental  
587 yeast crosses. *Journal of Evolutionary Biology*, 27(11), 2507-2519.  
588 doi:10.1111/jeb.12494
- 589 Stewart, E. L., Croll, D., Lendenmann, M. H., Sanchez-Vallet, A., Hartmann, F. E.,  
590 Palma-Guerrero, J., . . . McDonald, B. A. (2018). Quantitative trait locus  
591 mapping reveals complex genetic architecture of quantitative virulence in the  
592 wheat pathogen *Zymoseptoria tritici*. *Molecular Plant Pathology*, 19(1), 201-  
593 216. doi:10.1111/mpp.12515

## Forest yeast sampling biases

- 594 Strobe, P. K., Skelly, D. A., Kozmin, S. G., Mahadevan, G., Stone, E. A., Magwene,  
595 P. M., . . . McCusker, J. H. (2015). The 100-genomes strains, an *S. cerevisiae*  
596 resource that illuminates its natural phenotypic and genotypic variation and  
597 emergence as an opportunistic pathogen. *Genome Research*, 25(5), 762-774.  
598 doi:10.1101/gr.185538.114
- 599 Sweeney, J. Y., Kuehne, H. A., & Sniegowski, P. D. (2004). Sympatric natural  
600 *Saccharomyces cerevisiae* and *S. paradoxus* populations have different  
601 thermal growth profiles. *FEMS Yeast Research*, 4(4-5), 521-525.  
602 doi:10.1016/s1567-1356(03)00171-5
- 603 van Dijk, E. L., Auger, H., Jaszczyszyn, Y., & Thermes, C. (2014). Ten years of next-  
604 generation sequencing technology. *Trends in Genetics*, 30(9), 418-426.  
605 doi:10.1016/j.tig.2014.07.001
- 606 Warringer, J., Zorgo, E., Cubillos, F. A., Zia, A., Gjuvsland, A., Simpson, J. T., . . .  
607 Blomberg, A. (2011). Trait Variation in Yeast Is Defined by Population  
608 History. *Plos Genetics*, 7(6), 30. doi:10.1371/journal.pgen.1002111
- 609 White, T. J., Bruns, T., Lee, S., & Taylor, J. (1990). Amplification and Direct  
610 Sequencing fo Fungal Ribosomal RNA Genes for Phylogenetics. In M. A.  
611 Innis, D. H. Gelfand, J. J. Sninsky, & T. J. White (Eds.), *PCR Protocols: a*  
612 *Guide to Methods and Applications* (pp. 315-322): Academic Press.
- 613 Wickham, H. (2016). *ggplot2: Elegant Graphics for Data Analysis*: Springer.
- 614 Xie, L., Lehvavirta, S., Timonen, S., Kasurinen, J., Niemikapee, J., & Valkonen, J. P.  
615 T. (2018). Species-specific synergistic effects of two plant growth-Promoting  
616 microbes on green roof plant biomass and photosynthetic efficiency. *PLoS*  
617 *One*, 13(12), 16. doi:10.1371/journal.pone.0209432
- 618 Zackrisson, M., Hallin, J., Ottosson, L. G., Dahl, P., Fernandez-Parada, E.,  
619 Landstrom, E., . . . Blomberg, A. (2016). Scan-o-matic: High-Resolution  
620 Microbial Phenomics at a Massive Scale. *G3-Genes Genomes Genetics*, 6(9),  
621 3003-3014. doi:10.1534/g3.116.032342
- 622 Zhang, Z., Schwartz, S., Wagner, L., & Miller, W. (2000). A greedy algorithm for  
623 aligning DNA sequences. *Journal of Computational Biology*, 7(1-2), 203-214.  
624 doi:10.1089/10665270050081478  
625
